# Supplementary material for: The performance of three typical single and two coupled electrochemical processes for drilling wastewater treatment: comparison and implication
Source: Royal Society of Chemistry journal article supplement (doi:10.1039/d1ew00523e), 2021-01-01
Supplement: d1ew00523e1.pdf [file d1ew00523e1.pdf]

## Supporting Information

# The performance of three typical single and two coupled electrochemical processes for drilling wastewater treatment: comparison and implication

Fan-xin Kong<sup>a\*</sup>, Yu-kun Wang<sup>a</sup>, Jia-Mei Cao<sup>a</sup>, Wen-Peng Wang<sup>a</sup>, Jin-fu Chen<sup>a</sup>,

<sup>a</sup> State Key Laboratory of Heavy Oil Processing, Beijing Key Laboratory of Oil &  
Gas Pollution Control, China University of Petroleum, Beijing 102249, China

Submitted to

**Environmental Science: Water Science and Technology**

June 2021

---

\* Corresponding author: Dr. Fan-xin Kong, Tel.: +86-10-8973 3637;

Email: [kfx11@cup.edu.cn](mailto:kfx11@cup.edu.cn)

## S1. Characteristics of the prepared electrode

Surface morphology of prepared TiO<sub>2</sub>-NTs/SnO<sub>2</sub>-Sb electrode and the carbon-PTFE electrode differed substantially as observed by SEM (Fig. 2). Obvious spherical shape can be observed on the surface of TiO<sub>2</sub>-NTs/SnO<sub>2</sub>-Sb electrode, while porous structure can be observed on surface of carbon-PTFE electrode. The high surface roughness of the two electrodes was expected to enhance the electrode activity (Chai et al. 2011).

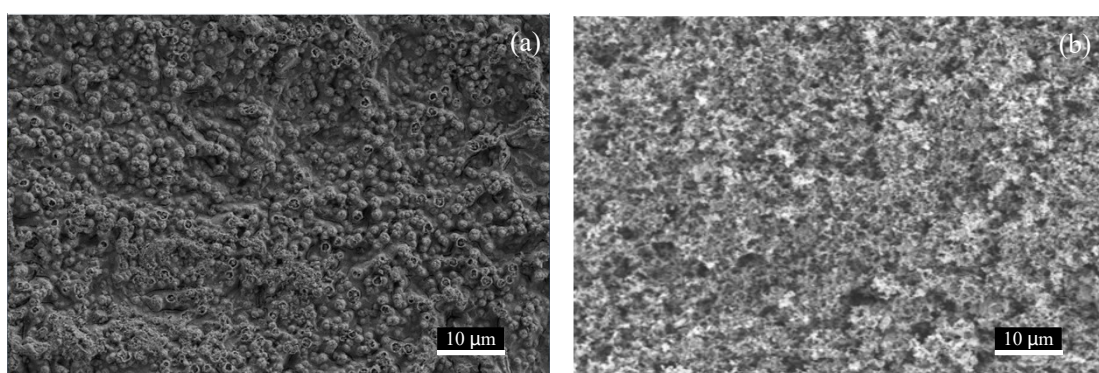

**Fig. S1.** SEM images of the prepared (a) TiO<sub>2</sub>-NTs/SnO<sub>2</sub>-Sb, (b) carbon-PTFE

TiO<sub>2</sub>-NTs/SnO<sub>2</sub>-Sb electrode as a high-efficiency anode material can generate strong oxidizing •OH for organic pollutant removal during ECO process, which can oxidize and decompose organic pollutants more thoroughly (Wang et al., 2019), while carbon-PTFE gas diffusion cathode can produce H<sub>2</sub>O<sub>2</sub> through O<sub>2</sub> reduction by two electron pathways. The yield of •OH produced by TiO<sub>2</sub>-NTs/SnO<sub>2</sub>-Sb anode and H<sub>2</sub>O<sub>2</sub> produced by carbon-PTFE cathode were measured to evaluate the •OH and H<sub>2</sub>O<sub>2</sub> production mass under current density of 20 mA cm<sup>-2</sup>, respectively. Previous study (Wang et al., 2021) indicated that peroxone reaction of electro-generated H<sub>2</sub>O<sub>2</sub> with O<sub>3</sub> can produce •OH. The linear increase for both •OH and H<sub>2</sub>O<sub>2</sub> production with time indicated that excellent performance of electrode and the electrodes was well prepared.

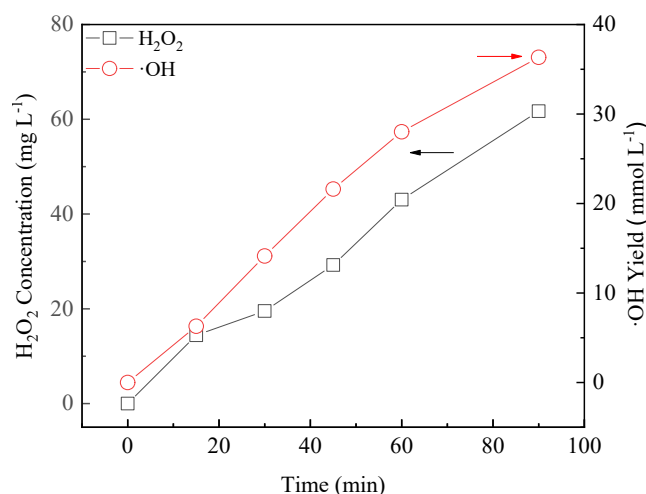

**Fig. S2.** •OH concentration in situ produced by TiO<sub>2</sub>-NTs/SnO<sub>2</sub>-Sb anode and H<sub>2</sub>O<sub>2</sub> produced by carbon-PTFE cathode under current density of 20 mA cm<sup>-2</sup>

## S2. The pH variation of the main single and coupled process

Table S1 Final pH variation of different processes

| Process    | pH     |        |        |        |        |
|------------|--------|--------|--------|--------|--------|
|            | 200 mA | 300 mA | 400 mA | 500 mA | 600 mA |
| EC         | 8.74   | 8.86   | 9.04   | 9.09   | 9.15   |
| ECO        | 6.91   | 6.74   | 6.57   | 5.82   | 5.67   |
| E-peroxone | 4.11   | 4.50   | 5.41   | 6.85   | 7.86   |
| ECP        | 8.36   | 8.76   | 8.84   | 8.91   | 8.93   |

## S3. Ozone oxidation process

Bench scale experiments of ozonation treatment of drilling wastewater was performed in a 150 mL air-tight organic glass electrolytic cell, using a DC power supply (KXN-305D, Zhaoqing, China), and a temperature-controlled magnetic stirrer. The experiment treated 150 mL of drilling wastewater with a magnetic stirring bar for 4 h, and used an ozone generator to continuously sparged the mixture of ozone and air into the reactor by a pure titanium microporous aerator at a flow rate of 0.6 L min<sup>-1</sup> (8.25 mg L<sup>-1</sup> O<sub>3</sub>).

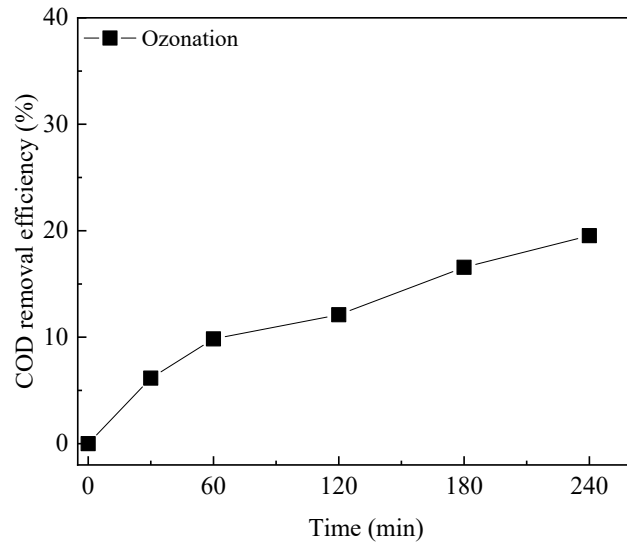

**Figure. S3** COD removal efficiency by ozonation

#### S4. Kinetics modeling for different processes

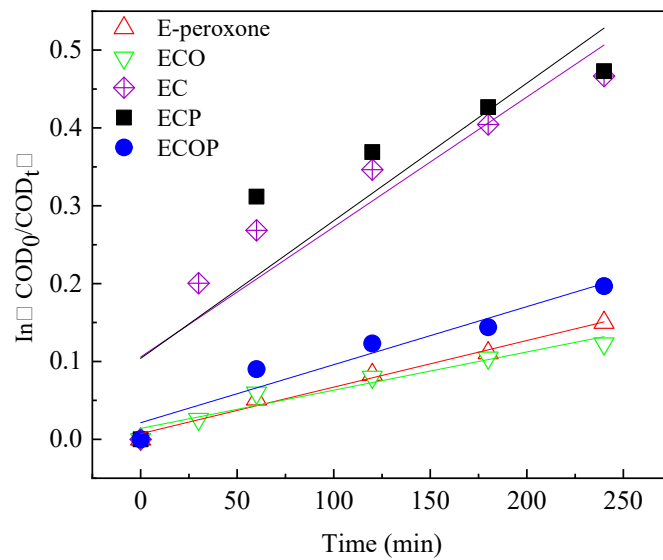

**Fig. S4** Pseudo-first order curves of COD degradation by different processes under the current of 300 mA

#### S5. Color variation by different processes

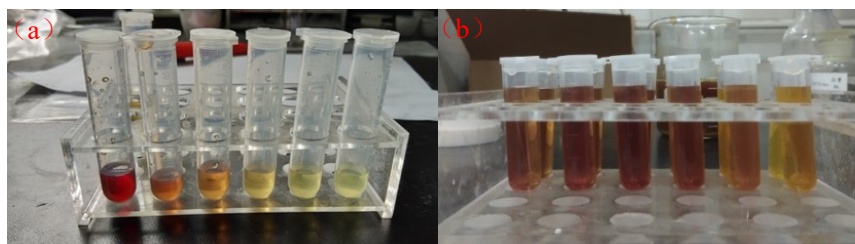

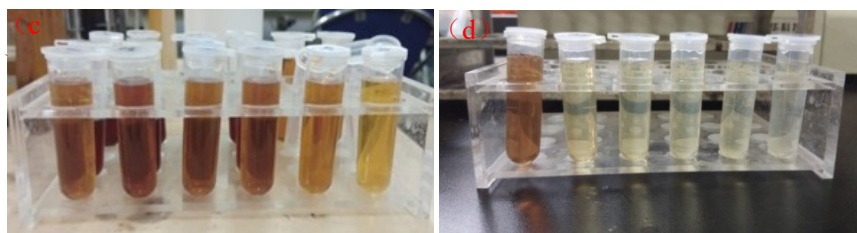

**Fig. S5.** Color variation by different processes

(a) EC (b) ECO (c) E-peroxone (d) ECP

**S6. Kinetics modeling for the EC-E-peroxone process.**

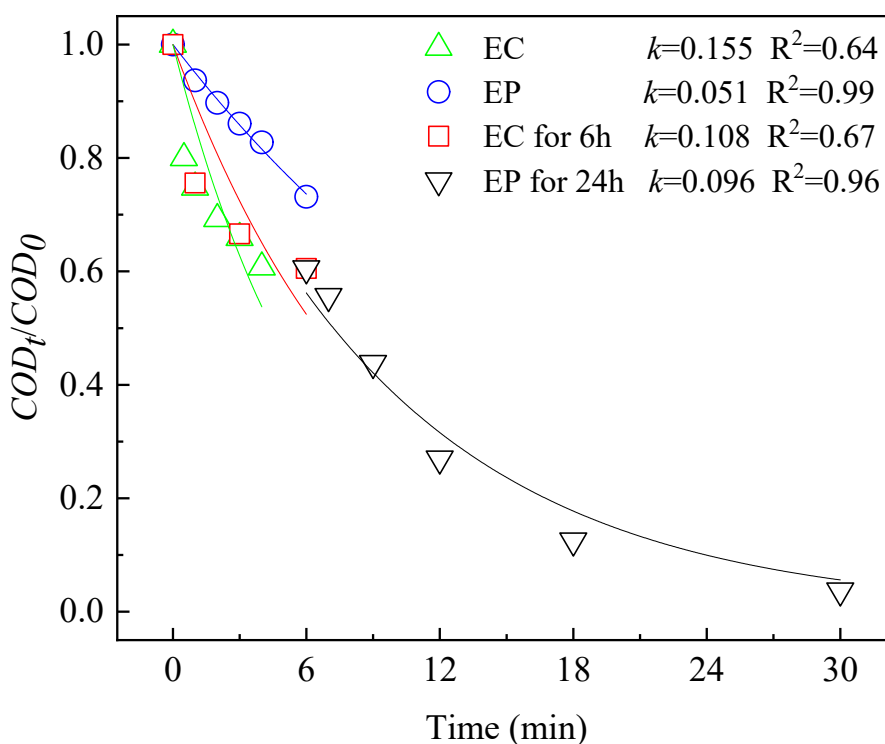

**Fig. S6** Pseudo-first order curves by EP (6 h), EC (4 h) and EC-EP (EC process in the first 6 h and then EP process in 24h) process under the current of 400 mA.

**References**

Chai, S., Zhao, G., Li, P., Lei, Y., Zhang, Y.-n. and Li, D. (2011). Novel sieve-like SnO<sub>2</sub>/TiO<sub>2</sub> nanotubes with integrated photoelectrocatalysis: Fabrication and application for efficient toxicity elimination of nitrophenol wastewater. The Journal of Physical Chemistry C 115(37), 18261-18269.

Kong, F.-x., Lin, X.-f., Sun, G.-d., Chen, J.-f., Guo, C.-m. and Xie, Y.F. (2019).

Enhanced organic removal for shale gas fracturing flowback water by electrocoagulation and simultaneous electro-peroxone process. *Chemosphere*, 218, 252-258.

Wang, Y.-k., Kong, F.-x., Yang, D.-m., Liu, Q., Lin, X.-f., Chen, J.-f. and Zhang, Y. (2021). The synergistic effect of electrocoagulation coupled with E-peroxone process for shale gas fracturing flowback water treatment. *Chemosphere*, 262.
